# Supplementary material for: An Adult Mouse Model of Dilated Cardiomyopathy Caused by Inducible Cardiac-Specific Bis Deletion
Source: MDPI journal article supplement (doi:10.3390/ijms22031343), 2021-01-29
Supplement: s1 [file s1]

Table S1. Primary antibodies used in this study.

| Target Protein | Provider                                 | Dilution |
|----------------|------------------------------------------|----------|
| BIS            | Ref (1)                                  | 1:10000  |
| HSPB8          | Abcam ( <i>Cambridge, U.K.</i> )         | 1:500    |
| HSP70          | Enzolife Sciences (Farmingdale, NY, USA) | 1:500    |
| DESMIN         | Abcam                                    | 1:100000 |
| GAPDH          | Santacruz ( <i>Dallas, TX, USA</i> )     | 1:500    |

Table S2. Primer sequences for qRT-PCR in this study.

| Gene          | Forward (5'→3')           | Reverse (5'→3')            |
|---------------|---------------------------|----------------------------|
| <i>BIS</i>    | ACTCTAAGCCTGTTTCCCAGAAGT  | AGACTTGTACTTGACCTGGGACAT   |
| <i>ANF</i>    | GATAGATGAAGGCAGGAAGCCGC   | AGGATTGGAGCCCAGAGTGGACTAGG |
| <i>BNP</i>    | TGTTTCTGCTTTTCCTTTATCTGTC | CTCCGACTTTTCTCTTATCAGCTC   |
| <i>β MHC</i>  | ATGTGCCGGACCTTGGA         | CCTCGGGTTAGCTGAGAGATCA     |
| <i>Col1a1</i> | TCACCAAACCTCAGAAGATGTAGGA | GACCAGGAGGACCAGGAAG        |
| <i>Col3a1</i> | ACAGCAGTCCAACGTAGATGAAT   | TCACAGATTATGTCATCGCAAAG    |
| <i>18s</i>    | GGAAGGGCACCACCAGGAGT      | TGCAGCCCCGGACATCTAAG       |

## Supplementary figures and figure legends

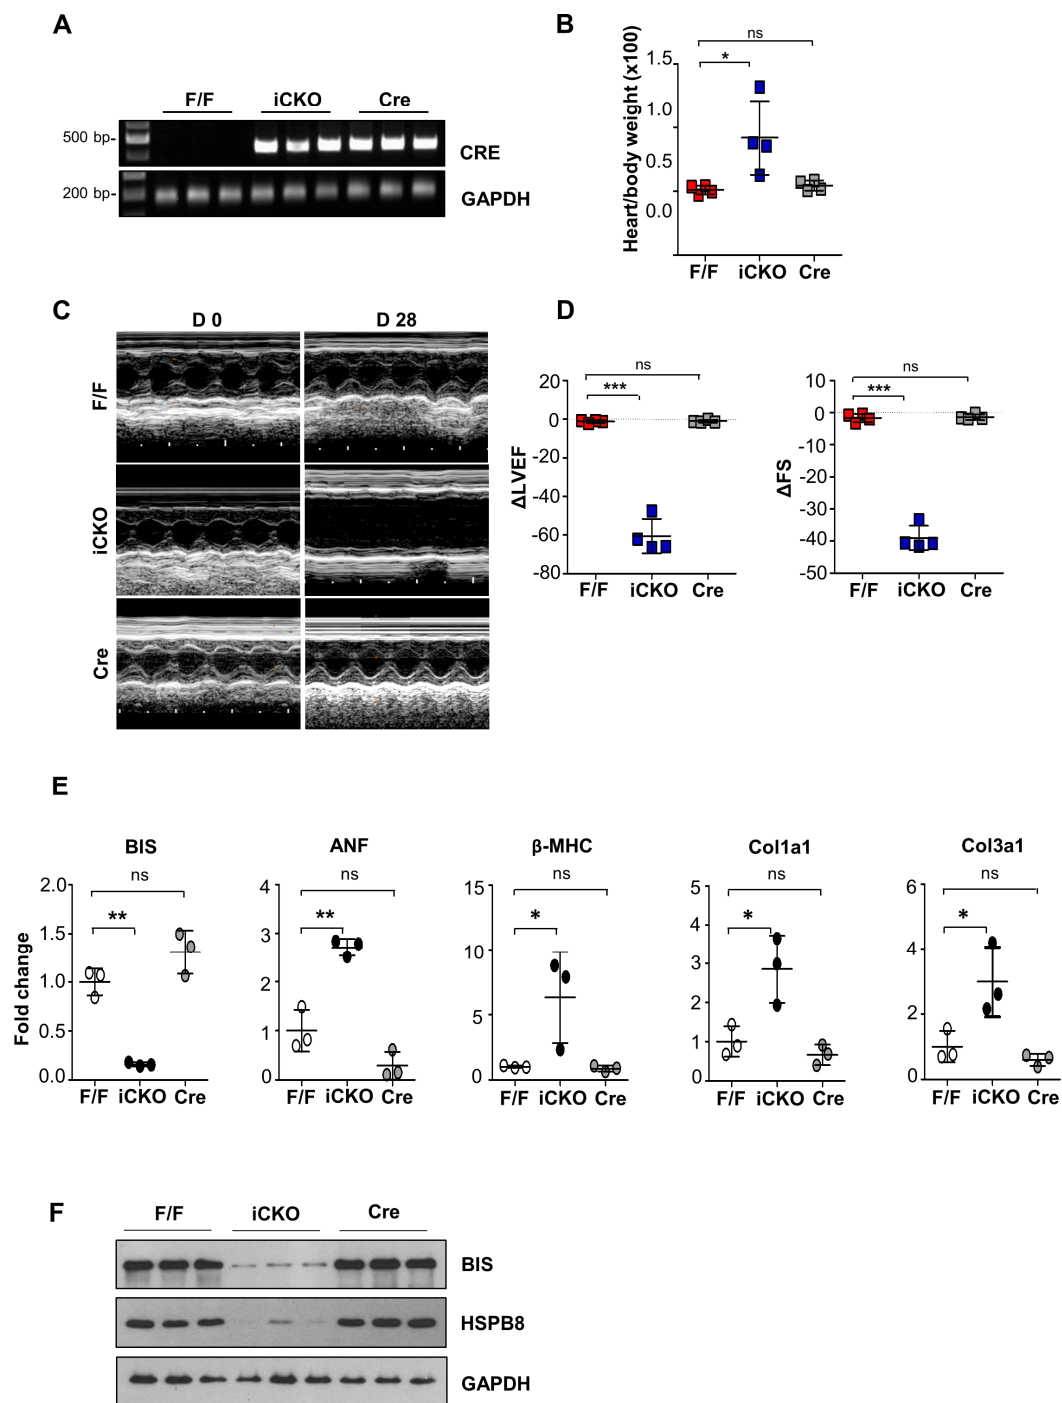

Figure S1. Effect of Cre expression alone on cardiac function.

To investigate the individual effect of Cre expression on cardiac phenotypes,  $\alpha$ -MHC-MerCreMer transgenic (Cre) mice 12–16 weeks of age were treated with tamoxifen, as shown in Fig. 1. The cardiac function of Cre mice was compared with that of control (F/F) and *Bis*-iCKO (iCKO) mice of the same age that received the same treatment starting on the same day ( $n = 4$  for all three groups, all males). (A) Genotyping was performed using PCR to confirm Cre expression in iCKO and  $\alpha$ -MHC-Cre

mice. The primers used for Cre and GAPDH were as follows. Cre, 5'-GTTTCACTGGTTATGCGGCGG (forward) and 5'-TTCCAGGGCGCGAGTTGATAG (reverse); GAPDH, 5'-GGTGTGAACGGATTTGGCCGTATT (forward) and 5'-GGCCTTGACTGTGCCGTTGAATTT (reverse). (B) The ratio of heart weight to body weight for each of the three groups indicates that the values for the Cre mice did not increase as much as those for the *Bis*-iCKO mice. (C) Echocardiographic tracing of the three groups before (D0) and after (D28) tamoxifen injection. (D) LVEF-delta and FS-delta changes on D28 also demonstrate that the LV function in Cre mice was not significantly impaired. (E) Expression profiles of BIS, ANF,  $\beta$ -MHC, Col1a1, and Col3a1 mRNA were determined using qRT-PCR. The heart failure markers and profibrotic mRNAs in Cre mice exhibited similar levels as the values for the F/F groups, whereas *Bis*-iCKO mice exhibited serious cardiac dysfunction, as shown in Fig. 2. (F) Western blotting assay results also show that BIS and HSPB expression was not reduced in the Cre groups. The data are presented as the mean  $\pm$  SD from three or four mice. \* $p$  < 0.05; \*\* $p$  < 0.01; \*\*\* $p$  < 0.001 (compared with the values from F/F mice). ns, not statistically significant.
